# Supplementary material for: Assessment of Biosecurity Status in Commercial Chicken Farms Found in Bishoftu Town, Oromia Regional State, Ethiopia
Source: PubMed Central journal article supplement (PMC8384549; doi:10.1155/2021/5591932), 2021-08-16
Supplement: 5591932.f1.pdf [file 5591932.f1.pdf]

**Questionnaire presented to chicken owners in Bishoftu town, Oromia Regional State,  
Ethiopia for the assessment of biosecurity status**

Dear participant, at first we would like to acknowledge you for your consent to participate in this study aimed at evaluating the biosecurity status of your chicken farm. The findings of this result will help you to recognize the status of your farm in relation to the entry and spread of chicken diseases and seek measures to improve if in case there are pitfalls. No one will have access to the information gathered and it will be stored double secured in a computer.

| <b>Part I. General Information on owners demography and farm characteristics</b> |                                                                            |                                                   |
|----------------------------------------------------------------------------------|----------------------------------------------------------------------------|---------------------------------------------------|
| 1. Farm identification:                                                          | Farm name _____                                                            | Chicken breed(s)_____                             |
| 2. Name of farm owner:                                                           | _____                                                                      |                                                   |
| 3. Farm ownership                                                                | <input type="checkbox"/> Female <input type="checkbox"/> Male              | <input type="checkbox"/> Both Female and male     |
| 4. Owner's education level                                                       | <input type="checkbox"/> Elementary and<br>Secondary education             | <input type="checkbox"/> Higher education         |
|                                                                                  | <input type="checkbox"/> Not disclosed                                     |                                                   |
| 5. Primary occupation                                                            | <input type="checkbox"/> Trader <input type="checkbox"/> Civil servant     | <input type="checkbox"/> Others                   |
| 6. Experience in rearing chicken                                                 | <input type="checkbox"/> Yes <input type="checkbox"/> No                   |                                                   |
| 7. Previous training on biosecurity                                              | <input type="checkbox"/> Yes <input type="checkbox"/> No                   |                                                   |
| 8. Farm capacity                                                                 | <input type="checkbox"/> Small-scale <input type="checkbox"/> Medium-scale | <input type="checkbox"/> Large-scale              |
| 9. Sources of poultry premises                                                   | <input type="checkbox"/> Owned <input type="checkbox"/> Rented             |                                                   |
| 10. Farm type                                                                    | <input type="checkbox"/> Layers <input type="checkbox"/> Broilers          | <input type="checkbox"/> Both layers and broilers |
| <b>Part II. Biosecurity</b>                                                      |                                                                            |                                                   |
| <b>A) Conceptual biosecurity</b>                                                 |                                                                            |                                                   |
| 1. How many is the distance of the farm from the main road (m) ?                 | <input type="checkbox"/> 0 – 50 <input type="checkbox"/> > 50 – 100        | <input type="checkbox"/> > 100 – 300              |
|                                                                                  | <input type="checkbox"/> > 300                                             |                                                   |
| 2. How many is the distance of the farm from the nearest farm (m)?               | <input type="checkbox"/> < 500 <input type="checkbox"/> ≥ 500              |                                                   |

|                                                                         |                                    |                                    |  |
|-------------------------------------------------------------------------|------------------------------------|------------------------------------|--|
| 3. How many is the distance of the farm from the residential place (m)? | <input type="checkbox"/> 0 – 20    | <input type="checkbox"/> >20 – 200 |  |
| 4. Is there no standing water In the farm?                              | <input type="checkbox"/> Yes       | <input type="checkbox"/> No.       |  |
| 5. Is the premise built with modified open side and curtains?           | <input type="checkbox"/> Yes       | <input type="checkbox"/> No        |  |
| 6. To which direction is the house oriented or positioned?              | <input type="checkbox"/> East-West | <input type="checkbox"/> Others    |  |
| 7. Are chicken house and hatcheries constructed of impervious material? | <input type="checkbox"/> Yes       | <input type="checkbox"/> No        |  |
| 8. Did employees of the farm receive training on biosecurity?           | <input type="checkbox"/> Yes       | <input type="checkbox"/> No        |  |
| <b>B) Structural biosecurity</b>                                        |                                    |                                    |  |
| 1. Is there fence and gate in the farm?                                 | <input type="checkbox"/> Yes       | <input type="checkbox"/> No        |  |
| 2. Is there footbath at the farm gate?                                  | <input type="checkbox"/> Yes       | <input type="checkbox"/> No        |  |
| 3. Do you prohibit vehicle entry?                                       | <input type="checkbox"/> Yes       | <input type="checkbox"/> No        |  |
| 4. Do farm vehicle parked off the farm?                                 | <input type="checkbox"/> Yes       | <input type="checkbox"/> No        |  |
| 5. Is there only one vehicle entry point?                               | <input type="checkbox"/> Yes       | <input type="checkbox"/> No        |  |
| 6. Is tire bath/spray at the gate?                                      | <input type="checkbox"/> Yes       | <input type="checkbox"/> No        |  |
| 7. Do you prohibit visitors from entering the farm?                     | <input type="checkbox"/> Yes       | <input type="checkbox"/> No        |  |
| 8. Do visitors sign on logbook?                                         | <input type="checkbox"/> Yes       | <input type="checkbox"/> No        |  |
| 9. Is there <b>no</b> purchase of day-old chicken?                      | <input type="checkbox"/> Yes       | <input type="checkbox"/> No        |  |
| 10. Is there <b>no</b> purchase of chicken feed?                        | <input type="checkbox"/> Yes       | <input type="checkbox"/> No        |  |
| 11. Is there <b>no</b> equipment exchange with other farms?             | <input type="checkbox"/> Yes       | <input type="checkbox"/> No        |  |

|                                                                                        |                              |                             |  |
|----------------------------------------------------------------------------------------|------------------------------|-----------------------------|--|
| 12. Is there <b>no</b> sharing of truck with others?                                   | <input type="checkbox"/> Yes | <input type="checkbox"/> No |  |
| 13. Is surface water <b>not</b> used for drinking?                                     | <input type="checkbox"/> Yes | <input type="checkbox"/> No |  |
| 14. Is surface water <b>not</b> used for cleaning?                                     |                              |                             |  |
| 15. Is there <b>no</b> pet animal in the farm?                                         | <input type="checkbox"/> Yes | <input type="checkbox"/> No |  |
| 16. Is there permanent rodent control in the farm?                                     | <input type="checkbox"/> Yes | <input type="checkbox"/> No |  |
| 17. Is poultry area <b>not</b> accessible to wild bird?                                | <input type="checkbox"/> Yes | <input type="checkbox"/> No |  |
| 18. Do wild bird has <b>no</b> access to stored food?                                  | <input type="checkbox"/> Yes | <input type="checkbox"/> No |  |
| 19. Is there <b>no</b> feeding outside and <b>no</b> access to the feed by wild birds? | <input type="checkbox"/> Yes | <input type="checkbox"/> No |  |
| 20. Do wild bird has <b>no</b> access to stored fresh litter?                          | <input type="checkbox"/> Yes | <input type="checkbox"/> No |  |
| 21. Is there permanent wild bird control?                                              | <input type="checkbox"/> Yes | <input type="checkbox"/> No |  |
| 22. Do you stay informed regarding the disease outbreak in the area?                   | <input type="checkbox"/> Yes | <input type="checkbox"/> No |  |
| <b>C) Operational biosecurity</b>                                                      |                              |                             |  |
| 1. Do farm workers use special cloth?                                                  | <input type="checkbox"/> Yes | <input type="checkbox"/> No |  |
| 2. Do farm workers use special footwear?                                               | <input type="checkbox"/> Yes | <input type="checkbox"/> No |  |
| 3. Do farm workers use special masker?                                                 | <input type="checkbox"/> Yes | <input type="checkbox"/> No |  |
| 4. Do farm workers use special hat?                                                    | <input type="checkbox"/> Yes | <input type="checkbox"/> No |  |
| 5. Do farm workers shower when in and out?                                             | <input type="checkbox"/> Yes | <input type="checkbox"/> No |  |
| 6. Is there regular laundering to hat and coveralls?                                   | <input type="checkbox"/> Yes | <input type="checkbox"/> No |  |
| 7. Is there signage at the farm?                                                       | <input type="checkbox"/> Yes | <input type="checkbox"/> No |  |

|                                                                        |                              |                             |  |
|------------------------------------------------------------------------|------------------------------|-----------------------------|--|
| 8. Do visitors have <b>no</b> access to poultry compartment?           | <input type="checkbox"/> Yes | <input type="checkbox"/> No |  |
| 9. Do visitors wear special cloth?                                     | <input type="checkbox"/> Yes | <input type="checkbox"/> No |  |
| 10. Do visitors wear special footwear?                                 | <input type="checkbox"/> Yes | <input type="checkbox"/> No |  |
| 11. Are there dedicated farm workers to each chicken house?            | <input type="checkbox"/> Yes | <input type="checkbox"/> No |  |
| 12. Are multiple age-group <b>not</b> kept together?                   | <input type="checkbox"/> Yes | <input type="checkbox"/> No |  |
| 13. Is the order of work from the youngest to the oldest               | <input type="checkbox"/> Yes | <input type="checkbox"/> No |  |
| 14. Do employee of the farm <b>don't</b> care for different age-group? | <input type="checkbox"/> Yes | <input type="checkbox"/> No |  |
| 15. Is there partial depopulation of chicken?                          | <input type="checkbox"/> Yes | <input type="checkbox"/> No |  |
| 16. Is there regular cleaning and disinfection of premises?            | <input type="checkbox"/> Yes | <input type="checkbox"/> No |  |
| 17. Are there paved places of discharge?                               | <input type="checkbox"/> Yes | <input type="checkbox"/> No |  |
| 18. Is there proper disposal of dead birds?                            | <input type="checkbox"/> Yes | <input type="checkbox"/> No |  |
| 19. Do farm workers have <b>no</b> contact with other farm?            | <input type="checkbox"/> Yes | <input type="checkbox"/> No |  |
| 20. Is there isolation room for diseased chicken?                      | <input type="checkbox"/> Yes | <input type="checkbox"/> No |  |
| 21. Is used cleaning water <b>not</b> drained outside the farm?        | <input type="checkbox"/> Yes | <input type="checkbox"/> No |  |
| 22. Is farm driver <b>not</b> permitted to enter poultry house?        | <input type="checkbox"/> Yes | <input type="checkbox"/> No |  |
| 23. Is removed litter stored at cover shed?                            | <input type="checkbox"/> Yes | <input type="checkbox"/> No |  |
| 24. Do you use high pressure sprayer for cleaning?                     | <input type="checkbox"/> Yes | <input type="checkbox"/> No |  |
| 25. Do you allow two weeks of opening period after disinfection?       | <input type="checkbox"/> Yes | <input type="checkbox"/> No |  |
| 26. Do you apply insecticide on to top of new litter?                  | <input type="checkbox"/> Yes | <input type="checkbox"/> No |  |

|                                                                                |                              |                             |  |
|--------------------------------------------------------------------------------|------------------------------|-----------------------------|--|
| 27. Do you apply insecticide on top of new litter?                             | <input type="checkbox"/> Yes | <input type="checkbox"/> No |  |
| 28. Are there other farm animals in the farm?                                  | <input type="checkbox"/> Yes | <input type="checkbox"/> No |  |
| 29. Are there <b>no</b> any poultry for hobby?                                 | <input type="checkbox"/> Yes | <input type="checkbox"/> No |  |
| 30. Is stored feed <b>not</b> accessible to rodents?                           | <input type="checkbox"/> Yes | <input type="checkbox"/> No |  |
| 31. Do you call veterinarians when a chicken appear sick?                      | <input type="checkbox"/> Yes | <input type="checkbox"/> No |  |
| 32. Do sick birds get examined regularly?                                      | <input type="checkbox"/> Yes | <input type="checkbox"/> No |  |
| 33. Is there regular seromonitoring of chickens?                               | <input type="checkbox"/> Yes | <input type="checkbox"/> No |  |
| 34. Are chicken vaccinated only for known disease in the past?                 | <input type="checkbox"/> Yes | <input type="checkbox"/> No |  |
| 35. Do you vaccinate chicken only according to the manufacturer's instruction? | <input type="checkbox"/> Yes | <input type="checkbox"/> No |  |
| 36. Do you use antibiotics when only birds are sick?                           | <input type="checkbox"/> Yes | <input type="checkbox"/> No |  |
| 37. Do you use antibiotics based on the recommended dosage?                    | <input type="checkbox"/> Yes | <input type="checkbox"/> No |  |
| 38. <b>Don't</b> you use expired vaccines or drugs?                            | <input type="checkbox"/> Yes | <input type="checkbox"/> No |  |
| 39. Do you keep records in the farm?                                           | <input type="checkbox"/> Yes | <input type="checkbox"/> No |  |
| 40. Is spilled feed cleaned up immediately?                                    | <input type="checkbox"/> Yes | <input type="checkbox"/> No |  |
